# Supplementary material for: The synergistic Reduning and cefmetazole sodium treatment of severe pneumonia is mediated by the AhR-Src-STAT3 pathway
Source: PubMed Central journal article supplement — J Thorac Dis. 2022 Feb;14(2):474–93. doi: 10.21037/jtd-22-126 (PMC8902113; doi:10.21037/jtd-22-126), 2022-02
Supplement: jtd-14-02-474-dss.pdf [file jtd-14-02-474-dss.pdf]

## Data Sharing Statement

|                     |                                                                                                                                                     |                                                                                                                                                                                                |
|---------------------|-----------------------------------------------------------------------------------------------------------------------------------------------------|------------------------------------------------------------------------------------------------------------------------------------------------------------------------------------------------|
| <b>Article Info</b> | <a href="https://dx.doi.org/10.21037/jtd-22-126">https://dx.doi.org/10.21037/jtd-22-126</a>                                                         |                                                                                                                                                                                                |
| <b>Item</b>         | <b>Question</b>                                                                                                                                     | <b>Authors' Response<br/>(place "-" if not applicable)</b>                                                                                                                                     |
| 1                   | Would you like to share data collected for your study to others?                                                                                    | Yes.                                                                                                                                                                                           |
| 2                   | If not, would you like to share the reason for your decision?                                                                                       | -                                                                                                                                                                                              |
| 3                   | What data in particular will be shared?                                                                                                             | RDN Synergistic CMZ treatment of severe pneumonia data will be shared.                                                                                                                         |
| 4                   | Any other documents will be shared? Such as study protocol, statistical analysis plan, informed consent form, clinical study report, analytic code. | Statistical analysis plan will be shared if requested.                                                                                                                                         |
| 5                   | When will data availability begin?                                                                                                                  | From the publication date.                                                                                                                                                                     |
| 6                   | When will data availability end?                                                                                                                    | Two years within the publication date.                                                                                                                                                         |
| 7                   | To whom will you share the data?                                                                                                                    | Researcher who are interested in studies of traditional Chinese medicine.                                                                                                                      |
| 8                   | For what type of analysis or purpose?                                                                                                               | Analysis to evaluate the effect of reducing in patients with severe pneumonia.                                                                                                                 |
| 9                   | How or where can the data/documents be obtained?                                                                                                    | Emails could be sent to the address below to obtain the shared data:<br><a href="mailto:puer6@163.com">puer6@163.com</a> or <a href="mailto:lvchuanzhu677@126.com">lvchuanzhu677@126.com</a> . |
| 10                  | Any other restrictions?                                                                                                                             | We may balance the potential benefits and risks for each request and then provide the data that could be shared.                                                                               |
